# Supplementary material for: Antimicrobial Carvacrol-Containing Polypropylene Films: Composition, Structure and Function
Source: PubMed Central journal article supplement (PMC6415180; doi:10.3390/polym10010079), 2018-01-16
Supplement: polymers-10-00079-s001.pdf [file polymers-10-00079-s001.pdf]

# Antimicrobial Carvacrol-Containing Polypropylene Films: Composition, Structure and Function

Max Krepker<sup>1</sup>, Ofer Prinz-Setter<sup>1</sup>, Rotem Shemesh<sup>2</sup>, Anita Vaxman<sup>2</sup>, David Alperstein<sup>3</sup> and Ester Segal<sup>1,4,\*</sup>

<sup>1</sup> Department of Biotechnology and Food Engineering, Technion—Israel Institute of Technology, Haifa 3200003, Israel; maks@campus.technion.ac.il (M.K.); oferp@campus.technion.ac.il (O.P.-S.)

<sup>2</sup> Carmel Olefins Ltd., P.O. Box 1468, Haifa 31014, Israel; Srotem@bazan.co.il (R.S.); Vaxman.anita@gmail.com (A.V.)

<sup>3</sup> Department of Mechanical Engineering, Ort Braude College, P.O. Box 78, Karmiel 2161002, Israel; david@braude.ac.il

<sup>4</sup> The Russell Berrie Nanotechnology Institute, Technion—Israel Institute of Technology, Haifa 3200003, Israel

\* Correspondence: esegal@technion.ac.il

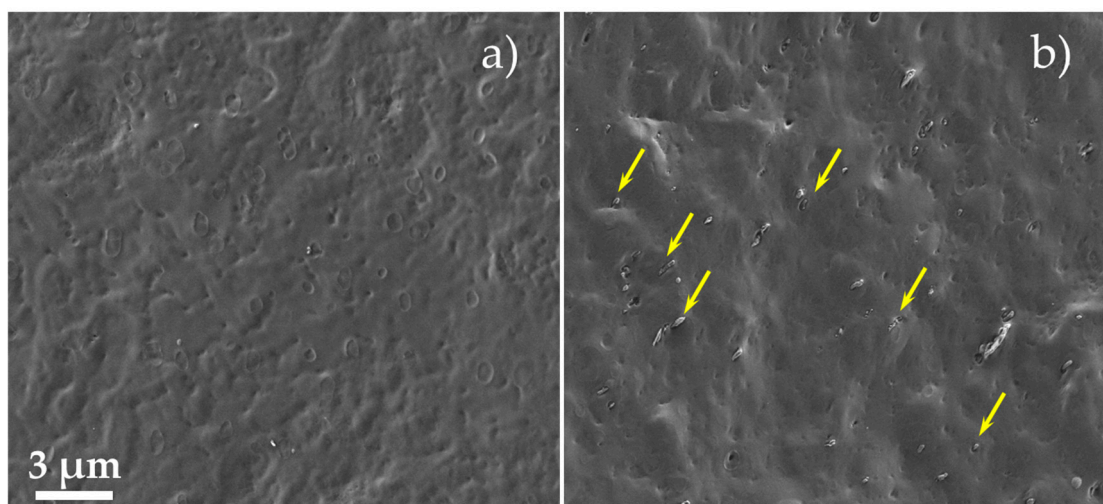

**Figure S1.** HR-SEM images of cryo-fractured cross-section of a) PP/carcacrol and b) PP/HNTs films. Several HNTs are marked with arrows for clarity.

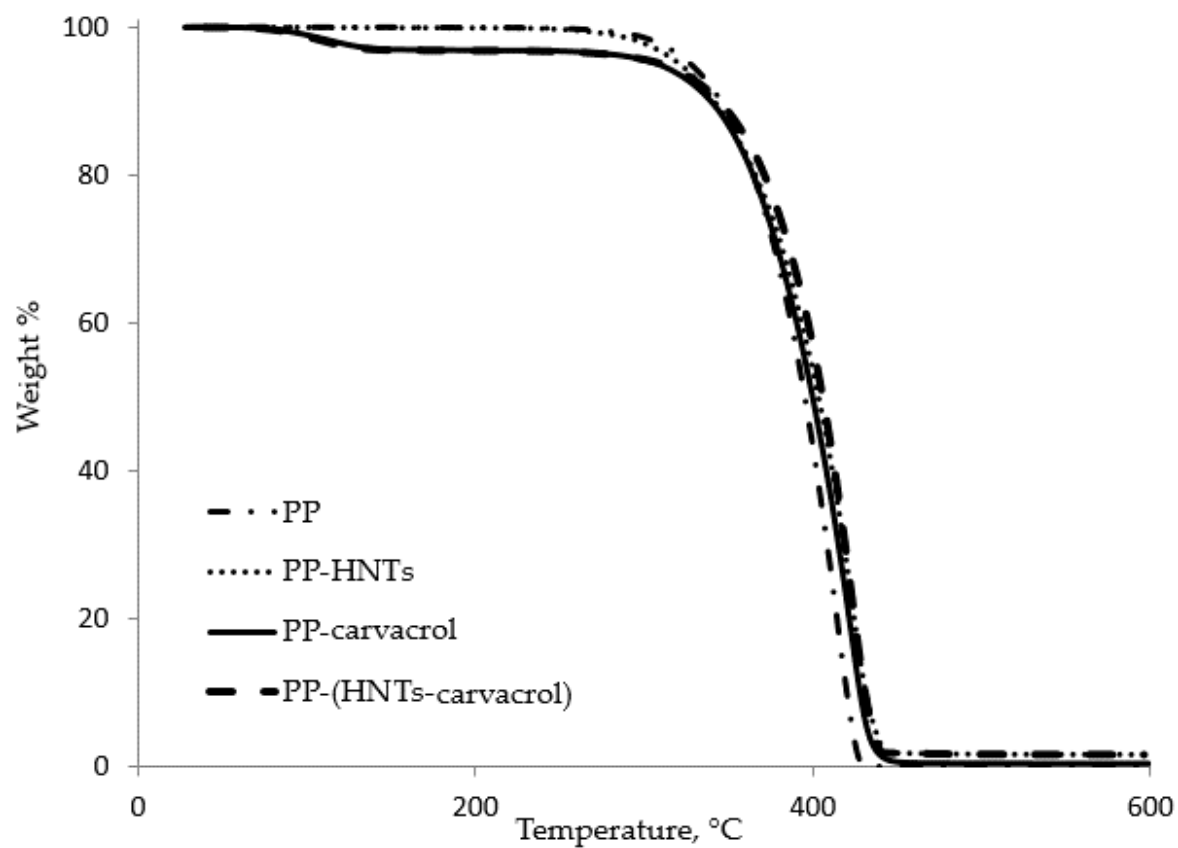

**Figure S2.** TGA thermograms of neat PP; PP/HNT; PP/carvacrol; and PP/(HNTs-carvacrol) nanocomposite films over the entire temperature region studied.

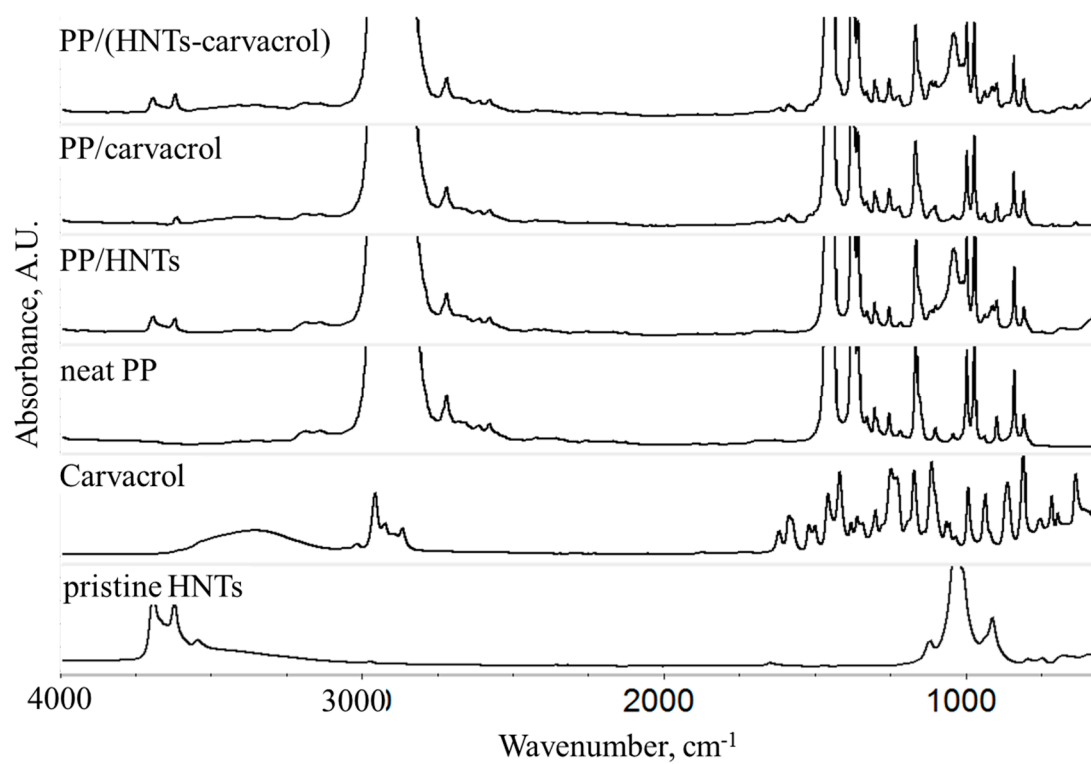

**Figure S3.** Full FTIR spectra (transmission mode) of pristine HNTs, CV, neat PP, PP/HNTs, PP/carvacrol and PP/(HNTs-carvacrol) films.
